# Supplementary material for: Uncertainty and sensitivity analysis of normalization factors to methodological assumptions
Source: Springer Nature journal article supplement (doi:10.1007/s11367-015-1013-5), 2015-12-14
Supplement: MOESM1 [file 7026422]

## Sheet: Summary
Contents
TABLE	S1	Indentified data sources for input data for NOx, SOx, NH3, CO, PM 2.5 and PM10
TABLE	S2	Relative differences of Table S1 data with source used in Sala et al 2015
TABLE	S3	Input data for water withdrawls
TABLE	S4	ILCD elementary flows and characterization factors for NOx
TABLE	S5	ILCD elementary flows and characterization factors for SOx
TABLE	S6	ILCD elementary flows and characterization factors for NH3
TABLE	S7	ILCD elementary flows and characterization factors for CO
TABLE	S8	ILCD elementary flows and characterization factors for PM
TABLE	S9	Spatially resolved characterisation factors for water depletion and options for their used into ILCD
TABLE	S10	Generated input of combinations for global uncertainty and sensitivity analysis
TABLE	S11	Evaluated model's outputs for global uncertainty and sensitivity analysis
TABLE	S12	Sobol indices
References
Sala S, Benini L, Mancini L, Pant R (2015) Integrated assessment of environmental impact of Europe in 2010: data sources and extrapolation strategies for calculating normalisation factors. Int J LCA 20: 1568-1585

## Sheet: TableS1
Pollutant emitted in EU27, year 2010 [kg]	from Sala et al. 2015, according to data sources hierarchy	EMEP modeled	EMEP reported	EEA	EDGAR + extrapolation
NOx (reported as NO2)	9140000000	9070000000	9160000000	9080000000	9910000000
SOx (reported as SO2)	4540000000	4530000000	4440000000	4540000000	6680000000
NH3	3620000000	3590000000	3840000000	3620000000	5010000000
CO	25900000000	24900000000	24700000000	25000000000	24000000000
PM2.5	1250000000	1400000000	1280000000	1250000000	1570000000
PM10	1840000000	2080000000	1910000000	1840000000	2330000000
Table S1: Indentified data sources for input data for NOx, SOx, NH3, CO, PM 2.5 and PM10

## Sheet: TableS2
Pollutant emitted in EU27, year 2010 [kg]	from Sala et al. 2015, according to data sources hierarchy	EMEP modeled	EMEP reported	EEA	EDGAR + extrapolation
NOx (reported as NO2)	1	0.99	1	0.99	1.08
SOx (reported as SO2)	1	1	0.98	1	1.47
NH3	1	0.99	1.06	1	1.38
CO	1	0.96	0.95	0.97	0.93
PM2.5	1	1.12	1.03	1	1.26
PM10	1	1.13	1.04	1	1.27
Table S2: Relative differences of Table S1 data with source used in Sala et al 2015

## Sheet: TableS3
		Water withdarawals, year 2010 [10^9 m3]
Country code	Country	from Sala et al. 2015	from Vandecasteele et al. 2014
AT	Austria	4500	3670
BE	Belgium	7800	6350
BG	Bulgaria	6900	6270
CY	Cyprus	220	228
CZ	Czech Republic	1900	1950
DK	Denmark	790	630
EE	Estonia	1900	1660
IE	Ireland	1000	765
FI	Finland	2700	2330
FR	France	37000	32700
DE	Germany	34000	32300
EL	Greece	9000	9550
HU	Hungary	5300	5280
IT	Italy	46000	42000
LV	Latvia	320	219
LT	Lithuania	940	2240
LU	Luxembourg	69	47
MT	Malta	37	32.7
NL	Netherlands	10000	11100
PL	Poland	9600	11900
PT	Portugal	10000	11100
RO	Romania	8100	5840
SK	Slovakia	1600	798
SI	Slovenia	1100	922
ES	Spain	35000	34105
SE	Sweden	2800	2630
UK	United Kingdom	11000	10600
European Union 27	EU27	250000	237000
	Table S3: Input data for water withdrawls

## Sheet: TableS4_NOx
flow	mapped as	Elementary flow category, level 2	Elementary flow category, level 3	Acidification	Eutrophication terrestrial midpoint	Eutrophication marine midpoint	Photochemical ozone formation midpoint, human health	Particulate matter/Respiratory inorganics midpoint
NOx	NO2	air	Emissions to air, unspecified	0.74	4.26	0.389	1	0.00722222
NOx	NO2	air	Emissions to lower stratosphere and upper troposphere	NA	NA	0.389	NA	NA
NOx	NO2	air	Emissions to non-urban air or from high stacks	0.74	4.26	0.389	1	0.00722222
NOx	NO2	air	Emissions to urban air close to ground	0.74	4.26	0.389	1	0.00777778
NOx	NO	air	Emissions to air, unspecified	1.13467	6.532	0.596467	1	0.0110741
NOx	NO	air	Emissions to lower stratosphere and upper troposphere	NA	NA	0.596467	NA	NA
NOx	NO	air	Emissions to non-urban air or from high stacks	1.13467	6.532	0.596467	1	0.0110741
NOx	NO	air	Emissions to urban air close to ground	1.13467	6.532	0.596467	1	0.0119259

## Sheet: TableS5_SOx
flow	mapped as	Elementary flow category, level 2	Elementary flow category, level 3	Acidification	Eutrophication terrestrial midpoint	Eutrophication marine midpoint	Photochemical ozone formation midpoint, human health	Particulate matter/Respiratory inorganics midpoint
SOx	SO2	air	Emissions to air, unspecified	1.31	NA	NA	0.0811	0.0611111
SOx	SO2	air	Emissions to lower stratosphere and upper troposphere	NA	NA	NA	NA	NA
SOx	SO2	air	Emissions to non-urban air or from high stacks	1.31	NA	NA	0.0811	0.0611111
SOx	SO2	air	Emissions to urban air close to ground	1.31	NA	NA	0.0811	0.0666667
SOx	SO	air	Emissions to air, unspecified	1.31	NA	NA	0.0811	0.0611111
SOx	SO	air	Emissions to lower stratosphere and upper troposphere	NA	NA	NA	NA	NA
SOx	SO	air	Emissions to non-urban air or from high stacks	1.31	NA	NA	0.0811	0.0611111
SOx	SO	air	Emissions to urban air close to ground	1.31	NA	NA	0.0811	0.0666667
SOx	SO3	air	Emissions to air, unspecified	1.04821	NA	NA	0.0811	0.0488988
SOx	SO3	air	Emissions to lower stratosphere and upper troposphere	NA	NA	NA	NA	NA
SOx	SO3	air	Emissions to non-urban air or from high stacks	1.04821	NA	NA	0.0811	0.0488988
SOx	SO3	air	Emissions to urban air close to ground	1.04821	NA	NA	0.0811	0.0533442

## Sheet: TableS6_NH3
flow	mapped as	Elementary flow category, level 2	Elementary flow category, level 3	Acidification	Eutrophication terrestrial midpoint	Eutrophication marine midpoint	Photochemical ozone formation midpoint, human health	Particulate matter/Respiratory inorganics midpoint
NH3	NH3	air	Emissions to air, unspecified	3.02	13.47	0.092	NA	0.0666667
NH3	NH3	air	Emissions to lower stratosphere and upper troposphere	NA	NA	NA	NA	NA
NH3	NH3	air	Emissions to non-urban air or from high stacks	3.02	13.47	0.092	NA	0.0666667
NH3	NH3	air	Emissions to urban air close to ground	3.02	13.47	0.092	NA	0.0666667

## Sheet: TableS7_CO
flow	mapped as	Elementary flow category, level 2	Elementary flow category, level 3	Acidification	Eutrophication terrestrial midpoint	Eutrophication marine midpoint	Photochemical ozone formation midpoint, human health	Particulate matter/Respiratory inorganics midpoint
CO	CO	air	Emissions to air, unspecified	NA	NA	NA	0.0456	0.000355556
CO	CO	air	Emissions to lower stratosphere and upper troposphere	NA	NA	NA	NA	NA
CO	CO	air	Emissions to non-urban air or from high stacks	NA	NA	NA	0.0456	0.000233333
CO	CO	air	Emissions to urban air close to ground	NA	NA	NA	0.0456	0.000516667

## Sheet: TableS8_PM
flow	mapped as	Elementary flow category, level 2	Elementary flow category, level 3	Acidification	Eutrophication terrestrial midpoint	Eutrophication marine midpoint	Photochemical ozone formation midpoint, human health	Particulate matter/Respiratory inorganics midpoint
PM	PM10	air	Emissions to air, unspecified	NA	NA	NA	NA	0.227778
PM	PM10	air	Emissions to lower stratosphere and upper troposphere	NA	NA	NA	NA	NA
PM	PM10	air	Emissions to non-urban air or from high stacks	NA	NA	NA	NA	0.0944444
PM	PM10	air	Emissions to urban air close to ground	NA	NA	NA	NA	0.405556
PM	PM2.5	air	Emissions to air, unspecified	NA	NA	NA	NA	1
PM	PM2.5	air	Emissions to lower stratosphere and upper troposphere	NA	NA	NA	NA	NA
PM	PM2.5	air	Emissions to non-urban air or from high stacks	NA	NA	NA	NA	0.35
PM	PM2.5	air	Emissions to urban air close to ground	NA	NA	NA	NA	3.33333

## Sheet: TableS9_WaterDepletion
Country code	Country	CF OECD average scarcity	CF ILCD - country specific	CF ILCD - country specific & gap filled with OECD average scarcity	CF ILCD - country specific & gap filled with factoirs from other countries (see colors)
AT	Austria	0.000162	0.012	0.012	0.012
BE	Belgium	0.000162	2.844	2.844	2.844
BG	Bulgaria	0.000162	missing	0.000162	0.089
CY	Cyprus	0.000162	missing	0.000162	0.184
CZ	Czech Republic	0.000162	0.619	0.619	0.619
DE	Germany	0.000162	1.522	1.522	1.522
DK	Denmark	0.000162	0.736	0.736	0.736
EE	Estonia	0.000162	missing	0.000162	0.008
EL	Greece	0.000162	0.184	0.184	0.184
ES	Spain	0.000162	1.656	1.656	1.656
FI	Finland	0.000162	0.008	0.008	0.008
FR	France	0.000162	0.619	0.619	0.619
HU	Hungary	0.000162	0.089	0.089	0.089
IE	Ireland	0.000162	0.008	0.008	0.008
IT	Italy	0.000162	0.87	0.87	0.87
LT	Lithuania	0.000162	missing	0.000162	0.008
LU	Luxembourg	0.000162	2.844	2.844	2.844
LV	Latvia	0.000162	missing	0.000162	0.008
MT	Malta	0.000162	missing	0.000162	0.184
NL	Netherlands	0.000162	0.124	0.124	0.124
PL	Poland	0.000162	1.121	1.121	1.121
PT	Portugal	0.000162	0.435	0.435	0.435
RO	Romania	0.000162	missing	0.000162	0.089
SE	Sweden	0.000162	0.005	0.005	0.005
SI	Slovenia	0.000162	missing	0.012	0.012
SK	Slovakia	0.000162	missing	0.619	0.619
UK	United Kingdom	0.000162	0.069	0.069	0.069
Country code	Country	CF OECD average scarcity	CF ILCD - country specific	CF ILCD - country specific & gap filled with OECD average scarcity	CF ILCD - country specific & gap filled with factoirs from other countries (see colors)
AT	Austria	0.000162	0.012	0.012	0.012
BE	Belgium	0.000162	2.844	2.844	2.844
BG	Bulgaria	0.000162	missing	0.000162	0.089
CY	Cyprus	0.000162	missing	0.000162	0.184
CZ	Czech Republic	0.000162	0.619	0.619	0.619
DE	Germany	0.000162	1.522	1.522	1.522
DK	Denmark	0.000162	0.736	0.736	0.736
EE	Estonia	0.000162	missing	0.000162	0.008
EL	Greece	0.000162	0.184	0.184	0.184
ES	Spain	0.000162	1.656	1.656	1.656
FI	Finland	0.000162	0.008	0.008	0.008
FR	France	0.000162	0.619	0.619	0.619
HU	Hungary	0.000162	0.089	0.089	0.089
IE	Ireland	0.000162	0.008	0.008	0.008
IT	Italy	0.000162	0.87	0.87	0.87
LT	Lithuania	0.000162	missing	0.000162	0.008
LU	Luxembourg	0.000162	2.844	2.844	2.844
LV	Latvia	0.000162	missing	0.000162	0.008
MT	Malta	0.000162	missing	0.000162	0.184
NL	Netherlands	0.000162	0.124	0.124	0.124
PL	Poland	0.000162	1.121	1.121	1.121
PT	Portugal	0.000162	0.435	0.435	0.435
RO	Romania	0.000162	missing	0.000162	0.089
SE	Sweden	0.000162	0.005	0.005	0.005
SI	Slovenia	0.000162	missing	0.012	0.012
SK	Slovakia	0.000162	missing	0.619	0.619
UK	United Kingdom	0.000162	0.069	0.069	0.069

[truncated: 3 more sheets: TableS10, TableS11, TableS12]
